# Supplementary material for: Drought Tolerance Strategies and Autophagy in Resilient Wheat Genotypes
Source: MDPI journal article supplement (doi:10.3390/cells11111765), 2022-05-27
Supplement: s1 [file s1]

## Supporting Information

### Autophagy and ROS homeostasis compensate for drought-induced damages to photosynthetic apparatus

Kathleen Hickey<sup>1</sup>, Magnus Wood<sup>1</sup>, Tom Sexton<sup>2</sup>, Yunus Sahin<sup>1</sup>, Taras Nazarov<sup>1</sup>, Jessica Fisher<sup>1</sup>, Karen A. Sanguinet<sup>3</sup>, Asaph Cousins<sup>2</sup>, Helmut Kirchhoff<sup>1\*</sup>, Andrei Smertenko<sup>1\*</sup>

<sup>1</sup>Institute of Biological Chemistry, Washington State University, Pullman, WA, USA

<sup>2</sup>School of Biological Sciences, Washington State University, Pullman, WA, USA

<sup>3</sup>Department of Crop and Soil Sciences, Washington State University, Pullman, WA, USA

**Supplemental Table S1. Sequences of primers used in this work.**

| Gene Name                            | Type                | Forward Primer                                                                              | Reverse Primer                     |
|--------------------------------------|---------------------|---------------------------------------------------------------------------------------------|------------------------------------|
| Catalase                             | Gateway cloning     | GGGGACAAGTTTGTACAAAAAAGCAGG<br>CTTCGAACGCATACCTGAACGTGTTGTTGTCTCACACATTTTGGAGCATTGACTG<br>C | GGGGACCACTTTGTACAAGAAAGCTGG        |
| Catalase-1                           | qPCR                | CACCTGGTGGAGAAGATCGC                                                                        | TCACCTCGAAGAAGCCCTTG               |
| Catalase-2                           | qPCR                | AACATGCAGGAGAACTGGAGAG                                                                      | CATGTGCCTGTAGTTGAGTGG              |
| ATG8                                 | Traditional Cloning | ACATATGAAATCCTTCAAGAAGGAATTC<br>AC                                                          | ACTCGAGTCACCCAAATGTCTTCTCGCT<br>GC |
| Rnase L Inhibitor Like Protein (RLI) | qPCR                | CGATTGAGAGCAGCGTATTGTTG                                                                     | AGTTGGTCGGGTCTCTTCTAAATG           |
| PEX11-A                              | qPCR                | CGCTAGGGGACGTGACTAA                                                                         | CAGCGCCGACAGCAATC                  |
| PEX11-B                              | qPCR                | CAACCCGTCTTGCAACCAC                                                                         | TTCCTATACCACCCAGCCCA               |
| PEX11-C                              | qPCR                | GAAGAACGCGATGCTGTCAA                                                                        | TAAAAGGCAATCCTGCCAAG               |
| DRP-3A                               | qPCR                | GACCTGCGGAGACAATGATAAC                                                                      | GTTGGTCCTCTCGAAGATAGA              |
| DRP-3B                               | qPCR                | TGGACGAGATACCGCTTGAA                                                                        | CACTGAAAGGTTGTTGCTGC               |
| FIS-1A                               | qPCR                | TCCAAGCAGACTGATGATGTG                                                                       | TGGGCTGGTGGTTTTATCAAGA             |
| ATG-8.2                              | qPCR                | TCGATCGCAGGTTGGAGATG                                                                        | TTGATCCTCTCCGCACCAC                |
| ATG-8.3                              | qPCR                | CTGGAAGGAGGCAAGCTGA                                                                         | TTGATCCTCTCCGCACCAC                |
| ATG-8.4                              | qPCR                | TCTCGCCTCCTCCCTTTACT                                                                        | TTGAACGAGCTCTTCGCCAT               |
| CAT1-5A                              | qPCR                | GGCCGAATTACCTGCTGCT                                                                         | AAGTAGTCGACCTCCTCGTCG              |
| CAT1-4B                              | qPCR                | GGACTATGAGGAGCGGTTTCG                                                                       | GTTGTCGATGTTGCGGTTTC               |
| CAT1-4D                              | qPCR                | CAGGCTGACAAGTCTCTCGG                                                                        | TTGGTACGTAATCCTCGCCG               |
| CAT2-6A                              | qPCR                | TCAAGAGAGGAAGGATGGAT                                                                        | GTAGTCCTCCAGCAAGATCG               |
| CAT2-6B                              | qPCR                | CCAGCTTAGCTGAGCTACTT                                                                        | CTCGTTGTCGTTCCACACG                |
| CAT2-6D                              | qPCR                | GGATGGATCGATCTGCCAT                                                                         | AGCAGCACAGTATGTAATCGA              |
| PEX11-7A                             | qPCR                | CCAGCTTACTACACAGGCA                                                                         | TGTGACGGTGTCCAATGAG                |
| PEX11-4A                             | qPCR                | TAGCCAGCTTACACACAAA                                                                         | CTCTGACGGTGTCCACTGA                |
| PEX11-7D                             | qPCR                | CCATCCAATAGCCTGGTT                                                                          | ATGCGAGCCATCACCATT                 |

**Supplemental Table S2. NCBI SRA RNA-Seq datasets used in the study.**

| GEO Accession No.              | Stress                       | Species                | Genotype                          | Tissue              | Stress duration | Repli-cates | Study location              | Reference                                                                                         |
|--------------------------------|------------------------------|------------------------|-----------------------------------|---------------------|-----------------|-------------|-----------------------------|---------------------------------------------------------------------------------------------------|
| <b>GSE134945</b>               | Drought                      | <i>A. thaliana</i>     | Columbia (WT)                     | Leaf                | 7d, 14d, 21 d   | 3           | Growth chamber              | <a href="https://doi.org/10.1186/s12864-019-6350-5">https://doi.org/10.1186/s12864-019-6350-5</a> |
| <b>GSE93979</b>                | Drought                      | <i>A. thaliana</i>     | Columbia (WT)                     | Leaf                | 21 d            | 3           | Growth chamber              | <a href="https://doi.org/10.1093/jxb/erx157">https://doi.org/10.1093/jxb/erx157</a>               |
| <b>GSE78972</b>                | Drought (long day)           | <i>Oryza Sativa</i>    | Nipponbare (WT)                   | Leaf                | 8 weeks         | 3           | Growth chamber              | <a href="https://doi.org/10.1111/pce.12760">https://doi.org/10.1111/pce.12760</a>                 |
| <b>GSE78972</b>                | Drought (short day)          | <i>Oryza Sativa</i>    | Nipponbare (WT)                   | Leaf                | 6 weeks         | 3           | Growth chamber              | <a href="https://doi.org/10.1111/pce.12760">https://doi.org/10.1111/pce.12760</a>                 |
| <b>GSE65022</b>                | Drought                      | <i>Oryza Sativa</i>    | Nipponbare (WT)                   | Leaf                | 10 d            | 2           | No info                     | No publication                                                                                    |
| <b>GSE57950</b>                | Drought                      | <i>Oryza indica</i>    | Huanghua zhan (P28) (Tolerant)    | Leaf                | 1-3 d           | 2           | Greenhouse                  | <a href="https://doi.org/10.1186/1471-2164-15-1026">https://doi.org/10.1186/1471-2164-15-1026</a> |
| <b>GSE57950</b>                | Drought                      | <i>Oryza indica</i>    | Huanghua zhan (H471) (Tolerant)   | Leaf                | 1-3 d           | 2           | Greenhouse                  | <a href="https://doi.org/10.1186/1471-2164-15-1026">https://doi.org/10.1186/1471-2164-15-1026</a> |
| <b>GSE57950</b>                | Drought                      | <i>Oryza indica</i>    | Huanghua zhan (HHZ) (Susceptible) | Leaf                | 1-3 d           | 2           | Greenhouse                  | <a href="https://doi.org/10.1186/1471-2164-15-1026">https://doi.org/10.1186/1471-2164-15-1026</a> |
| <b>GSE132113</b>               | Drought                      | <i>Zea mays</i>        | B104                              | Leaf (V9 5 d stage) |                 | 2           | Field experiments           | <a href="https://doi.org/10.1186/s12870-019-1941-5">https://doi.org/10.1186/s12870-019-1941-5</a> |
| <b>SRP106756 (PRJNA385354)</b> | Drought                      | <i>Zea mays</i>        | M54 and 753F                      | Leaf                | 1d, 2d, 3d      | 1           | No info                     | No publication                                                                                    |
| <b>SRP132035 (PRJNA432650)</b> | Drought                      | <i>Zea mays</i>        | No info                           | Leaf                | No info         | 4           | No info                     | No publication                                                                                    |
| <b>GSE48507</b>                | Drought (Dehydration stress) | <i>Zea mays</i>        | B73                               | Seedling            | 6h and 66 h     | 2           | Greenhouse                  | <a href="https://doi.org/10.1186/1471-2229-14-141">https://doi.org/10.1186/1471-2229-14-141</a>   |
| <b>GSE137780</b>               | Drought                      | <i>Zea mays</i>        | B104                              | Leaf                | No info         | 2           | No info                     | No publication                                                                                    |
| <b>GSE137780</b>               | Drought                      | <i>Zea mays</i>        | DH4866                            | Leaf                | No info         | 2           | No info                     | No publication                                                                                    |
| <b>GSE137780</b>               | Drought                      | <i>Zea mays</i>        | W22                               | Leaf                | No info         | 2           | No info                     | No publication                                                                                    |
| <b>GSE128441</b>               | Drought                      | <i>Sorghum Bicolor</i> | RTX430                            | Leaf                | 3 week          | 3           | Field experiment            | <a href="https://doi.org/10.1073/pnas.1907500116">https://doi.org/10.1073/pnas.1907500116</a>     |
| <b>GSE128441</b>               | Drought                      | <i>Sorghum Bicolor</i> | RTX430                            | Leaf                | 6 week          | 3           | Field experiment            | <a href="https://doi.org/10.1073/pnas.1907500116">https://doi.org/10.1073/pnas.1907500116</a>     |
| <b>GSE80699</b>                | Drought                      | <i>Sorghum Bicolor</i> | IS20351 (Sensitive)               | Leaf                | 8 days          | 3           | Controlled Field experiment | <a href="https://doi.org/10.1186/s12870-016-0800-x">https://doi.org/10.1186/s12870-016-0800-x</a> |
| <b>GSE80699</b>                | Drought                      | <i>Sorghum Bicolor</i> | IS20330 (Tolerant)                | Leaf                | 8 days          | 3           | Controlled Field experiment | <a href="https://doi.org/10.1186/s12870-016-0800-x">https://doi.org/10.1186/s12870-016-0800-x</a> |

**Supplemental Table S3. Enrichment of gene ontology terms related to stress response in the RNA-Seq datasets.**

| Dataset                 | Species | Term                                                        | GO_ID      | Gene_ratio | Fold change  | Q-value |
|-------------------------|---------|-------------------------------------------------------------|------------|------------|--------------|---------|
| <b>GSE137780_DH4866</b> | Maize   | Defense response                                            | GO:0006952 | 20/51      | -6.86/4.68   | 0.022   |
|                         |         | negative regulation of gene expression                      | GO:0045814 | 3/6        | -2.19/-0.89  | 0.046   |
|                         |         | regulation of cyclin-dependent protein s...                 | GO:0000079 | 4/18       | -2.02/2.39   | 0.008   |
| <b>GSE137780_B104</b>   | Maize   | Response to oxidative stress                                | GO:0006979 | 31/185     | -4.68/3.74   | 0.032   |
|                         |         | Response to abiotic stimulus                                | GO:0009628 | 10/27      | -2.88/6.51   | 0.024   |
|                         |         | regulation of cyclin-dependent protein kinase               | GO:1904029 | 4/18       | -2.09/ -0.67 | 0.001   |
| <b>GSE137780_W22</b>    | Maize   | regulation of cellular component organization               | GO:0051128 | 15/56      | -2.17/2.07   | 0.035   |
|                         |         | regulation of biosynthetic process                          | GO:0009889 | 413/1320   | -8.30/7.35   | 0.035   |
|                         |         | regulation of cyclin-dependent protein synthesis            | GO:0000079 | 12/18      | -1.13/2.02   | 0.001   |
|                         |         | regulation of actin polymeriza-<br>tion or depolymerization | GO:0008064 | 11/26      | -2.17/2.07   | 0.000   |
|                         |         | regulation of cellular component organization               | GO:0051128 | 13/56      | -0.70/4.25   | 0.000   |
| <b>GSE78972S</b>        | Rice    | response to external stimulus                               | GO:0009605 | 207/494    | -6.65/8.27   | 0.000   |
|                         |         | regulation of gene expression,<br>epigenetics               | GO:0040029 | 65/128     | 3.28/5.08    | 0.000   |
|                         |         | Regulation of anatomical<br>structure size                  | GO:0090066 | 169/465    | -12.15/5.71  | 0.000   |
| <b>GSE78972L</b>        | Rice    | abscission                                                  | GO:0009838 | 9/29       | -2.93/0.56   | 0.000   |
|                         |         | response to abiotic stimulus                                | GO:0009628 | 1118/2194  | -9.52/9.71   | 0.000   |
|                         |         | response to extracellular<br>stimulus                       | GO:0009991 | 105/304    | -9.15/9.71   | 0.001   |
|                         |         | regulation of biological process                            | GO:0050789 | 710/1588   | -8.13/8.73   | 0.000   |
|                         |         | regulation of cell size                                     | GO:0008361 | 179/465    | -10.98/8.52  | 0.000   |
|                         |         | regulation of gene expression,<br>epigeneti...              | GO:0040029 | 64/128     | -2.48/3.31   | 0.000   |
|                         |         | anatomical structure<br>morphogenesis                       | GO:0009653 | 343/886    | -10.98/8.52  | 0.000   |
| <b>GSE65022</b>         | Rice    | abscission                                                  | GO:0009838 | 9/29       | -2.60/3.27   | 0.000   |
|                         |         | response to extracellular<br>stimulus                       | GO:0009991 | 79/304     | -6.71/9.40   | 0.000   |
|                         |         | regulation of cell size                                     | GO:0008361 | 122/465    | -6.71/7.11   | 0.000   |
|                         |         | regulation of cellular process                              | GO:0050794 | 524/1464   | -8.69/8.72   | 0.005   |
| <b>GSE57950P</b>        | Rice    | peroxisome                                                  | GO:0005777 | 100/191    | -5.63/8.48   | 0.000   |
|                         |         | response to stress                                          | GO:0006950 | 1106 /3618 | -10.35/9.82  | 0.036   |
|                         |         | response to abiotic stimulus                                | GO:0009628 | 736/2194   | -10.35/9.82  | 0.00    |
|                         |         | regulation of anatomical<br>structure size                  | GO:0090066 | 99/465     | -7.03/4.58   | 0.013   |
|                         |         | regulation of biological process                            | GO:0050789 | 498/1588   | -8.8/6.00    | 0.000   |

|                         |             |                                             |            |           |              |       |
|-------------------------|-------------|---------------------------------------------|------------|-----------|--------------|-------|
|                         |             | regulation of gene expression               | GO:0010468 | 34/128    | -2.68/1.70   | 0.000 |
| <b>GSE57950HZ</b>       | Rice        | regulation of anatomical structure size     | GO:0090066 | 127/465   | -9.66/4.45   | 0.000 |
|                         |             | regulation of cell size                     | GO:0008361 | 127/465   | -9.66/4.45   | 0.001 |
|                         |             | regulation of gene expression               | GO:0010468 | 46/128    | -4.16/1.72   | 0.000 |
|                         |             | Signal transduction                         | GO:0007165 | 533/1464  | -9.75/11.15  | 0.001 |
| <b>GSE57950H</b>        | Rice        | response to stress                          | GO:0006950 | 1198/3618 | -10.63/10.41 | 0.000 |
|                         |             | response to external stimulus               | GO:0009605 | 132/494   | -9.56/4.61   | 0.000 |
|                         |             | regulation of cellular process              | GO:0050794 | 501/1464  | -9.09/7.22   | 0.018 |
|                         |             | peroxisome                                  | GO:0005777 | 99/191    | -8.73 / 3.01 | 0.000 |
| <b>GSE128441W3</b>      | Sorghum     | regulation of metabolic process             | GO:0019222 | 104/1170  | -2.69/7.58   | 0.003 |
| <b>GSE128441W6</b>      | Sorghum     | regulation of cellular process              | GO:0050794 | 106/1586  | -2.75/3.44   | 0.027 |
|                         |             | regulation of transcription                 | GO:0006355 | 65/1077   | -2.75/3.44   | 0.000 |
| <b>GSE80699_IS20351</b> | Sorghum     | integral component of peroxisomal membrane  | GO:0005779 | 3/7       | 0.86/2.01    | 0.000 |
|                         |             | regulation of transcription                 | GO:0006355 | 107/996   | -8.37/7.47   | 0.012 |
| <b>GSE80699_IS22330</b> | Sorghum     | cellular response to stress                 | GO:0033554 | 13/141    | -4.67/-4.49  | 0.000 |
| <b>GSE93979</b>         | Arabidopsis | response to stress                          | GO:0006950 | 577/3887  | -9.67/7.98   | 0.000 |
|                         |             | regulation of response to osmotic stress    | GO:0047484 | 6/37      | -1.01/4.19   | 0.010 |
|                         |             | regulation of response to external stimulus | GO:0032101 | 20/102    | -0.86/2.18   | 0.000 |
|                         |             | response to jasmonic acid                   | GO:0009753 | 42/208    | -4.78/4.22   | 0.000 |
| <b>GSE101488</b>        | Arabidopsis | response to salt stress                     | GO:0009651 | 34/476    | -2.13/5.18   | 0.000 |
|                         |             | cellular response to endogenous stimulus    | GO:0071495 | 60/1050   | -4.19/4.87   | 0.000 |
| <b>GSE108610</b>        | Arabidopsis | response to oxidative stress                | GO:0006979 | 93/459    | -5.36/3.37   | 0.000 |
| <b>GSE134945</b>        | Arabidopsis | auxin-activated signaling pathway           | GO:0009734 | 13/208    | -2.82/1.02   | 0.001 |

**Supplemental Table S4. Impact of drought on transcription of peroxisome biogenesis genes in *A. thaliana*.**

| Gene   | mRNA-Seq Datasets |           |           |           |          |           |           |           |
|--------|-------------------|-----------|-----------|-----------|----------|-----------|-----------|-----------|
|        | GSE93979          | GSE134945 | GSE108610 | GSE101488 | GSE93979 | GSE134945 | GSE108610 | GSE101488 |
|        | Drought           |           |           |           | Control  |           |           |           |
| PEX11b | up                | -         | -         | -         | -        | -         | -         | -         |
| DRP5B  | up                | -         | -         | -         | -        | -         | -         | -         |
| PEX13  | up                | -         | -         | -         | -        | -         | -         | -         |
| CAT1   | up                | -         | -         | -         | -        | -         | -         | -         |
| CAT2   | -                 | -         | -         | -         | up       | -         | -         | -         |
| PEX19B | -                 | -         | -         | up        | -        | -         | -         | -         |

**Supplemental Table S5. Impact of drought on transcription of peroxisome biogenesis genes in *Z. mays*.** Genes marked in red show inconsistent expression pattern between control and drought-stress mRNA-Seq datasets.

| Gene                   | mRNA-Seq Datasets |          |                |                  |               |           |           |          |                |                  |               |           |
|------------------------|-------------------|----------|----------------|------------------|---------------|-----------|-----------|----------|----------------|------------------|---------------|-----------|
|                        | GSE132113         | GSE48507 | GSE137780_B104 | GSE137780_DH4866 | GSE137780_W22 | SRP132035 | GSE132113 | GSE48507 | GSE137780_B104 | GSE137780_DH4866 | GSE137780_W22 | SRP132035 |
|                        |                   |          |                |                  |               |           |           |          |                |                  |               |           |
|                        | Drought           |          |                |                  |               |           | Control   |          |                |                  |               |           |
| PEX11C                 | up                | up       | up             | -                | -             | -         | -         | -        | -              | -                | up            | -         |
| PEX11B                 | -                 | -        | -              | -                | up            | up        | -         | -        | -              | -                | -             | -         |
| PEX11D                 | -                 | up       | -              | -                | -             | -         | -         | -        | -              | up               |               | up        |
| CAT3 (zm00001d014848)  | up                | up       | up             | -                | -             | -         | -         | -        | -              | -                |               | -         |
| CAT3 (zm00001d027511)  | -                 | -        | -              | -                | -             | up        | up        | up       | up             | up               | up            | -         |
| CAT3 (zm00001d054044)  | -                 | -        | -              | -                | up            | -         | up        | up       | up             | -                | -             | up        |
| FIS1A (zm00001d047461) | -                 | -        | -              | -                | up            | -         | -         | -        | -              | -                | -             | -         |
| DRP3B                  | -                 | -        | -              | -                | -             | -         | -         | -        | -              | up               | up            | up        |
| PEX1                   | -                 | -        | -              | -                | -             | -         | -         | -        | -              | -                | up            | up        |
| PEX2                   | -                 | -        | -              | -                | -             | -         | -         | -        | -              | -                | up            | -         |
| PEX3B                  | -                 | -        | -              | -                | -             | -         | -         | -        | -              | -                | -             | up        |
| PEX4                   | up                | -        | -              | up               | up            | -         | -         | -        | up             | -                | -             | -         |
| PEX5                   | -                 | -        | -              | -                | -             | -         | -         | -        | -              | -                | -             | up        |
| PEX6 (zm00001d026313)  | -                 | up       | -              | -                | -             |           | -         | -        | -              | up               | up            | -         |
| PEX6 (zm00001d002462)  | -                 | up       | -              | -                | -             |           | -         | -        | -              | up               | -             | -         |
| PEX10                  | -                 | -        | -              | -                | -             | -         | -         | -        | -              | -                | -             | up        |
| PEX12                  | -                 | -        | -              | -                | -             | -         | -         | -        | -              | up               | up            | up        |
| PEX13                  | up                | -        | up             | -                | up            | -         | -         | -        | -              | up               | -             | -         |
| PEX16                  | -                 | -        | -              | -                | -             | -         | -         | -        | -              | -                | up            | up        |
| PEX19A                 | -                 | -        | -              | up               | up            | -         | -         | -        | -              | -                | -             | up        |
| PEX22(zm00001d026361)  | -                 | -        | -              | -                | -             | up        | -         | -        | -              | -                | -             | -         |
| PEX22(zm00001001849)   | -                 | -        | -              | -                |               | -         | -         | -        | -              | -                | -             | up        |

**Supplemental Table S6. Impact of drought on transcription of peroxisome biogenesis genes in *S. bicolor*.**

| Gene                                        | mRNA-Seq Datasets |              |         |         |              |              |         |         |
|---------------------------------------------|-------------------|--------------|---------|---------|--------------|--------------|---------|---------|
|                                             | SE12844 (w3)      | SE12844 (w6) | IS20351 | IS20330 | SE12844 (w3) | SE12844 (w6) | IS20351 | IS20330 |
|                                             | DROUGHT           |              |         |         | CONTROL      |              |         |         |
| <i>DRP3B</i>                                | UP                | -            | -       | UP      | -            | -            | -       | -       |
| <i>DRP5B</i>                                | -                 | -            | -       | -       | -            | -            | -       | UP      |
| <i>PEX11B</i>                               | -                 | -            | UP      | -       | -            | -            | -       | -       |
| <i>PEX11C</i>                               | -                 | -            | UP      | UP      | -            | -            | -       | -       |
| <i>PEX11D</i>                               | -                 | -            | -       | -       | UP           | -            | -       | -       |
| <i>FIS1A</i><br>( <i>Sobic.001G367800</i> ) | -                 | -            | -       | UP      | -            | -            | -       | -       |
| <i>FIS1A</i><br>( <i>Sobic.009G122100</i> ) | -                 | -            | -       | UP      | -            | -            | -       | -       |
| <i>CAT3</i><br>( <i>Sobic.010G274500</i> )  | -                 | -            | UP      | UP      | -            | -            | -       | -       |
| <i>CAT3</i><br>( <i>Sobic.004G011566</i> )  | -                 | -            | -       | UP      | -            | -            | -       | -       |
| <i>PEX4</i>                                 | -                 | -            | -       | UP      | -            | -            | -       | -       |
| <i>PEX5</i>                                 | -                 | -            | UP      | -       | -            | -            | -       | -       |
| <i>PEX10</i>                                | -                 | -            | UP      | -       | -            | -            | -       | -       |
| <i>PEX14</i>                                | -                 | -            | -       | UP      | -            | -            | -       | -       |
| <i>PEX22</i>                                |                   | UP           | UP      | UP      |              |              |         |         |

**Supplemental Table S7. Impact of drought on transcription of peroxisome biogenesis genes in *O. sativa*.** Genes marked in red show inconsistent expression pattern between control and drought-stress mRNA-Seq datasets.

| Gene                           | mRNA-Seq Datasets |                  |          |                |                 |                |                 |                  |          |                |                 |                |
|--------------------------------|-------------------|------------------|----------|----------------|-----------------|----------------|-----------------|------------------|----------|----------------|-----------------|----------------|
|                                | GSE78972 (long)   | GSE78972 (short) | GSE65022 | GSE57950 (P28) | GSE57950 (H471) | GSE57950 (HHZ) | GSE78972 (long) | GSE78972 (short) | GSE65022 | GSE57950 (P28) | GSE57950 (H471) | GSE57950 (HHZ) |
|                                | Drought           |                  |          |                |                 |                | Control         |                  |          |                |                 |                |
| <i>PEX11C</i>                  | up                | up               | up       | up             | up              | up             | -               | -                | -        | -              | -               | -              |
| <i>PEX11A</i> (LOC_os03G19010) | up                | up               | up       | -              | up              | -              | -               | -                | -        | -              | -               | -              |
| <i>PEX11B</i>                  | -                 | -                | -        | -              | -               | -              | up              | up               | up       | up             | up              | up             |
| <i>PEX11D</i>                  | -                 | -                | -        | -              | -               | -              | up              | up               | up       | -              | -               | -              |
| <i>DRP3B</i>                   | up                | up               | -        | -              | -               | -              | -               | -                | -        | -              | -               | -              |
| <i>DRP5B</i>                   | up                | up               | -        | up             | up              | up             | -               | -                | -        | -              | -               | -              |
| <i>CAT3</i> (LOC_os06g51150)   | up                | up               | up       | up             | up              | up             | -               | -                | -        | -              | -               | -              |
| <i>CAT3</i> (LOC_os03g03910)   | -                 | -                | -        | -              | -               | -              | up              | up               | up       | up             | up              | up             |
| <i>CAT3</i> (LOC_os02g02400)   | -                 | -                | -        | -              | up              | up             | -               | up               | up       | -              | -               | -              |
| <i>FIS1A</i> (LOC_os03g24060)  | up                | up               | -        | -              | -               | -              | -               | -                | -        | -              | -               | up             |
| <i>FISA</i> (LOC_os05g31770)   | -                 | up               | -        | -              | -               | -              | -               | -                | -        | up             | up              | up             |
| <i>PEX1</i>                    | up                | -                | -        | -              | -               | -              | -               | up               | -        | -              | -               | -              |
| <i>PEX2</i>                    | -                 | -                | -        | -              | -               | -              | up              | -                | -        | up             | -               | up             |
| <i>PEX3B</i>                   | -                 | -                | -        | -              | up              | up             | -               | -                | -        | -              | -               | -              |
| <i>PEX4</i>                    | -                 | -                | -        | -              | -               | -              | up              | up               | -        | up             | -               | up             |
| <i>PEX5</i>                    | -                 | -                | -        | -              | up              | up             | -               | -                | -        | -              | -               | -              |
| <i>PEX6</i>                    | -                 | -                | -        | -              | -               | -              | up              | up               | -        | -              | -               | -              |
| <i>PEX7</i>                    | -                 | up               | up       | -              | -               | -              | -               | -                | -        | up             | -               | -              |
| <i>PEX10</i>                   | -                 | -                | -        | -              | -               | -              | up              | up               | -        | -              | -               | -              |
| <i>PEX12</i>                   | -                 | -                | -        | -              | -               | -              | up              | up               | -        | -              | -               | -              |
| <i>PEX13</i>                   | -                 | -                | up       | -              | -               | -              | up              | up               | -        | up             | -               | up             |
| <i>PEX14</i>                   | -                 | -                | -        | -              | -               | -              | -               | up               | -        | -              | -               | -              |
| <i>PEX16</i>                   | up                | -                | -        | -              | up              | up             | -               | -                | -        | -              | -               | -              |
| <i>PEX19A</i>                  | -                 | -                | -        | -              | -               | -              | -               | up               | -        | -              | -               | -              |
| <i>PEX22</i> (LOC_os04g53690)  | -                 | -                | -        | -              | -               | -              | up              | -                | -        | -              | -               | -              |



**Supplemental Table S8. Nucleic acid sequences of the genes used in the study.**

| Gene     | NCBI Accession Number | Nucleic Acid Sequence                                                                                                                                                                                                                                                                                                                                                                                                                                                                                                                                                                                                                                                                                                                                                                                                                                                                                                                                                                                                                                                                                                                                                                                                                                                                                                                                                                                                                                                                                                                          |
|----------|-----------------------|------------------------------------------------------------------------------------------------------------------------------------------------------------------------------------------------------------------------------------------------------------------------------------------------------------------------------------------------------------------------------------------------------------------------------------------------------------------------------------------------------------------------------------------------------------------------------------------------------------------------------------------------------------------------------------------------------------------------------------------------------------------------------------------------------------------------------------------------------------------------------------------------------------------------------------------------------------------------------------------------------------------------------------------------------------------------------------------------------------------------------------------------------------------------------------------------------------------------------------------------------------------------------------------------------------------------------------------------------------------------------------------------------------------------------------------------------------------------------------------------------------------------------------------------|
| ATG8     | AK457482.1            | ATGAAATCCTTCAAGAAGGAATTCACCCTGGAGGAGAGGGCGAATGAGTC<br>GGCCGCCATGATCGCCAAGTACCCCGGCAGGATCCCCGTGATTGTTGAA<br>AGGTTTTCAAGGAGTAATCTTCCAGAAATGGAGAAGAGGAAGTACCTGGT<br>TCCTTGTGACATGCCAGTTGGGCAGTTCATTTTCATCCTGCGCTCCAGGTT<br>ACATCTGTCTCCAGGGACGGCGCTTTTCGTGTTTGTGCGCGACACCTTGC<br>CCCAGACCGCTAACCTGATGGGTAGCGTGTATGATTCGTACAAAGATAAG<br>CAGGATGGCTTCCTCTACATGTGTTACAGCAGCGAGAAGACATTTGGGTG<br>A                                                                                                                                                                                                                                                                                                                                                                                                                                                                                                                                                                                                                                                                                                                                                                                                                                                                                                                                                                                                                                                                                                                                                    |
| Catalase | X94352.1              | ATGGATCCCTACAAGCACCGGCCACGAGCGGGGCCAACTCCGCCTACT<br>GGACCACCAACTCCGGCGCCCCCGTCTGGAACAACAACAACGCCCTCAC<br>CGTCGGACACCGAGGACCTATCCTCCTTGAGGATTACCATCTGATTGAAA<br>AGCTTGCACAATTTGACCGGGAACGCATACCTGAACGTGTTGTCATGCA<br>CGGGGAGCCAGTGCAAAGGGGTTCTTTGAGGTGACTCATGATGTTTCTCA<br>GCTCACATGTGCTGACTTTCTCCGGGCTCCTGGGGTTTCAGACCCCGGTTA<br>TTGTCCGGTTCTCTACCGTTGTGCATGAGCGTGGAAGCCCTGAGACCCCTC<br>AGGGATCCACGTGGTTTTGTCAGTGAAGTTCTACACCAGAGAGGGTAACCT<br>TGACCTTGTTGGGAACAATATGCCTGTGTTTTTATCCGAGATGGGATGAA<br>GTTCCCTGACATGGTCCATGCTTTCAAGCCAAGTTCGAAGACCAACATGC<br>AGGAGAACTGGAGAGTAGTTGACTTCTTTTCGCACCAACCCGGAGAGTCTG<br>CACATGTTACCTTCCTATTTGACGATGTTGGCATTCCACTCAACTACAGG<br>CACATGGACGGTTTTGGTGTCAACACCTACACCTTAATCAGCAGGGATGG<br>AAAGGCTCACCTGGTTAAGTTCCATTGGAAACCTACATGTGGTGTGAAGT<br>GCCTCTTGATGATGAAGCTGTTACTGTTGGAGGCACCTGCCACACCCAT<br>GCCACAAAGGACTTGACTGATTCTATTGCAGCTGGGAATTACCCAGAATG<br>GAAGCTTTTCATCCAGACCATTGATGCTGATCACGAGGATAGATTTGACTT<br>TGACCCTCTTGATGTCACCAAGACCTGGCCAGAGGACATCATCCCCTGC<br>AACCAGTTGGACGGATGGTACTGAACAAGAACATTGACAATTTCTTCGCG<br>GAAAATGAACAGCTTGCTTTCTGCCAGCAGTCACTGTCCCTGGAATCCA<br>CTACTCTGATGATAAGCTGCTCCAGACAAGGATCTTCTCATATGCTGATAC<br>CCAAAGGCACCGTCTTGGTCCAACTACTTGATGCTCCCCGTGAATGCC<br>CGAAATGTGCTCACCAACAACCATCATGATGGCTTAATGAATTTTCATTC<br>ACAGGGATGAGGAGGTGAACCTACTTCCCTTCAAGGGTTGATCCTACTCGT<br>CATGCTGAAAAGGACCCTATGCCTCCGCGTGTCTATCTGGCTGCCGGGA<br>GAAGTGCAATTATCGACAAGGAGAACAATTTCAAGCAGCTGGTGAGAGAT<br>ATCGGTCCTTCGACCCTGCCAGGCAAGACCGTTTCCTCCAGCGGTGGGTT<br>GATGCGCTCACGGATGCTCGTGTACCCATGA |
| PEX11C   | AK456439              | ATGGCCTCGCTGGACACCGTCAGAGGAGATCTTGGCCTGGTTGTTTTGTA<br>CCTAAGCAAGGCTGAGGCAAGAGATAAGATCTGTAGAGCTATACAATATGGA<br>TCCAAGTTCTGAGCAACGGACAACCAGGACCTGCACAGAATGTCGACAA<br>ATCAACTAGTCTAGCTCGGAAAGTTTTCCGACTGTTTAAGTTTGTTAATGAT<br>CTCCAAGCTCTGATTAGCCCCCTGCCAAAGGAACCTCACTTCCGCTGATC<br>TTACTTGAAAAGTCGAAGAACGCGATGCTGTCAACTTTCCCTAGTTCTGGAC<br>CAAATTGTTTGGGCTGGGAGAACAGGAGTATACAAGAACAAGGAGCGAGC<br>AGAGTTTCTTGGCAGGATAGCATTTTATTGCTTTCTCGGATCCAATACCTGT<br>ACTACTATCATCGAGCTAGCCGAGCTTCAGCGGCTTTCCAAATCGATGAAG<br>AAGTTAGAGAAGGACCTCAAGCACCAAGAGCTGTACAAGAACGAGCAGTA<br>TCGGATGAAGCTGAAGAAGTCCAACGAGAGGCTGCTCGCCCTCATCAAAT<br>CGAGCCTCGACATAGTCGTCGCCGTGGGGCTGCTGCAACTGGCACCAAA<br>AAAGGTCACCTCCTCGCGTCACGGGGGCGTTTGGGTTTCGCTAGCTCGCTCA<br>TCGCTGTTACCAGTTGCTTCCAGCCCCAGCCAAATCCAAGTGATCTGCCT<br>GCCACCTCGGGCCAGGCAGCTGGTGCATCGATTGGTGAACGGCGGTT<br>GCTGTGCCCCCTTGTGTCGCTGATACTGATAAGAAATAAATCTGGACCGA<br>ACTGTCCGTCCCCGTAGGATATAACCGAGGATTATTGCTGTGCATGCTGGC<br>ATTGCCGAGGGCCATCTCATAGCCTGGTTGATCTGCCTTGCCTTAGACTTG<br>ATCATGTAGCACGCTTGATTTGTATGGTCCGGTGTGCCACTATCATACTAC<br>AACTGTTGCGAAATAATTAGAAATTTCACTACTAGAATGGTGATGGCTCGCGT                                                                                                                                                                                                                                                                                                                                                                                                               |

|           |                |                                                                                                                                                                                                                                                                                                                                                                                                                                                                                                                                                                                                                                                                                                                                                                                                                                                                                                                                                                                                                                      |
|-----------|----------------|--------------------------------------------------------------------------------------------------------------------------------------------------------------------------------------------------------------------------------------------------------------------------------------------------------------------------------------------------------------------------------------------------------------------------------------------------------------------------------------------------------------------------------------------------------------------------------------------------------------------------------------------------------------------------------------------------------------------------------------------------------------------------------------------------------------------------------------------------------------------------------------------------------------------------------------------------------------------------------------------------------------------------------------|
|           |                | CTAGATTTATCTTGACGTTGTGCCGCGACGATGA                                                                                                                                                                                                                                                                                                                                                                                                                                                                                                                                                                                                                                                                                                                                                                                                                                                                                                                                                                                                   |
| PEX11C-7A | AK456439.1     | ATGGCCTCATTGGACACCGTCACAGGAGATCTTGGCCTGGTTGTTTTGTAC<br>CTAAGCAAGGCTGAGGCAAGAGATAAGATCTGCAGAGCTATACAATATGGA<br>TCCAAGTTCTTGAGCAACGGACAACCAGGACCTGCACAGAATGTCGACAA<br>ATCAACTAGTCTTGCTCGGAAAGTTTTCCGGCTGTTTAAGTTTGTTAATGAT<br>CTCCAAGCTCTGATTAGCCCCCTGCCAAAGGAACCTCCACTCCGCTGATC<br>TTACTTGGAAGTCAAGAACGCGATGCTGTCAACTTTCCTCTTTCTGGAC<br>CAAATTGTTGGGCTGGGAGAACAGGAGTATACAAGAACAAGGAGCGAGC<br>AGAATTCCTTGGCAGGATTGCCTTTTATTGCTTTCTTGGATCTAATACATGTA<br>CTACCATCATCGAGCTAGCGGAGCTTCAGCGGCTTTCCAAATCGATGAAGA<br>AGTTAGAGAAGGACCTCAAGCACCAAGAGCTGTACAAGAACGAGCAGTAT<br>CGGATGAAGCTGAAGAAGTCCAATGAGAGGCTGCTTGCTCTCATCAAATCG<br>AGCCTTGACATAGTTGTGCGAGTGGGGCTGCTGCAACTGGCCCCGAAAAA<br>GGTCACTCCTCGCGTCACTGGGGCCTTTGGGTTGCTAGCTCGCTCATCG<br>CCTGTTACCAGTTGCTTCCAGCCCCAGCCAAATCCAAGTGA                                                                                                                                                                                                                                                        |
| PEX11C-7D | XM_037603080.1 | ATGGCCTCATTGGACACCGTCAGAGGAGATCTTGGCCTGGTTGTTTTGTAC<br>CTAAGCAAGGCTGAGGCAAGAGATAAGATCTGCAGAGCTATACAATATGGA<br>TCCAAGTTCTTGAGCAACGGACAACCAGGACCTGCACAGAATGTCGACAA<br>ATCAACTAGTCTTGCTCGGAAAGTTTTCCGGCTGTTTAAGTTTGTTAATGAT<br>CTCCAAGCTCTGATTAGCCCCCTGCCAAAGGAACCTCCACTCCGCTGATC<br>TTACTTGGAAGTCAAGAACGCGATGCTGTCAACTTTCCTCTTTCTGGAC<br>CAAATTGTTGGGCTGGGAGAACAGGAGTATACAAGAACAAGGAGCGAGC<br>AGAATTCCTTGGCAGGATTGCCTTTTATTGCTTTCTTGGATCTAATACATGTA<br>CTACCATCATCGAGCTAGCGGAGCTTCAGCGGCTTTCCAAATCGATGAAGA<br>AGTTAGAGAAGGACCTCAAGCACCAAGAGCTGTACAAGAACGAGCAGTAT<br>CGGATGAAGCTGAAGAAGTCCAATGAGAGGCTGCTTGCTCTCATCAAATCG<br>AGCCTTGACATAGTTGTGCGAGTGGGGCTGCTGCAACTGGCCCCGAAAAA<br>GGTCACTCCTCGCGTCACTGGGGCCTTTGGGTTGCTAGCTCGCTCATCG<br>CCTGTTACCAGTTGCTTCCAGCCCCAGCCAAATCCAAGTGA                                                                                                                                                                                                                                                        |
| PEX11C-4A | XM_037567661.1 | ATGGCCTCAGTGGACACCGTCAGAGGGGATCTTGGCCTGGTTGTTTTGTA<br>CCTAAGCAAGGCTGAGGCAAGAGATAAGATCTGTAGGGCTATACAATATGG<br>ATCCAAGTTCTTGAGCAACGGACAGCCAGGACCTGCACAGAATGTCGACA<br>AATCAACTAGTCTAGCTCGGAAAGTTTTCCGCTGTTTAAGTTTGTTAATGA<br>TCTCCAAGCTCTGATTAGTCCCCCTGCCAAAGGAACCTCCACTTCCACTGAT<br>CTTACTTGGAAGTCAAGAACGCGATGCTGTCAACTTTCCTCTTTCTGGA<br>CCAAATTGTTGGGCTGGGAGAACAGGAGTATACAAGAACAAGGAGCGAG<br>CGGAGTTCCTTGGCAGGATAGCATTTTATTGCTTTCTCGGATCTAATACCTG<br>TACTACCATCATCGAGCTAGCGGAGCTTCAGCGGCTTTCCAAATCGATGAA<br>GAAGTTAGAGAAGGACCTCAAGCACCAAGAGCTGCACAAGAACGAGCAGT<br>ATCGGATGAAGCTGCAGAAGTCCAACGAGAGGCTGCTCGCCCTCATCAA<br>TCGAGCCTCGACATAGTTGTTGCGGTGGGGCTCCTGCAACTTGCCCCGAA<br>AAAGGTCACTCCTCGCGTACAGGGGCCTTTGGGTTGCTAGCTCGCTCA<br>TCGCTGTTACCAGTTGCTTCCAGCCCCAGCCAGATCCAAGTGA                                                                                                                                                                                                                                                          |
| CAT1-5A   | MK091459.1     | ATGGACCCCTACAAGTACCGGCCGTCGAGCTCCTTCAACGCCCCGATGTG<br>GAGCACCAACTCCGGCGCGCCCGTCTGGAACAACGACAACCTCCCTCACC<br>GTCGGATCCCAGGCCCGATCCTGCTGGAGGACTACCACCTGGTGGAGA<br>AGATCGCCGACTTCGACCGCGAGCGCATCCCGGAGCGGGTGGTGCACGC<br>CCGGGGCGCCAGCGCCAAGGGCTTCTTCGAGGTGACCCACGACGTCTCC<br>CACCTGACCTGCGCCGACTTCTCCGCGCGCCGGGGGTGCAGACCCCC<br>GTCATCGTGCGCTTCTCCACCGTGATCCACGAGCGCGGCTCCCCGGAGA<br>CGCTCCGCGACCCGCGCGGCTTCGCCATCAAGTTCTACACCCGGGAGGG<br>CAACTGGGACCTGGTCGGCAACAACCTCCCCGTCTTCTTATCCGCGACG<br>GCATGAAGTTCCCGGACATGGTGCACGCGCTCAAGCCCAACCCCAAGACC<br>CACATCCAGGAGAACTGGCGCATCCTCGACTTCTTCTCCACACCCGGA<br>GTCGCTCCACATGTTACCTTCTCTTCGACGACGTGGGCGTGCCCCGCCG<br>ACTACCGCCACATGGACGGCTCCGGCGTCAACACCTACACGCTCGTCAAC<br>CGCGCCGGCAAGGCGCACTACGTCAAGTTCCACTGGAAGCCACCTGCG<br>GCGTCAAGTCCCTCCTCGAGGAGGAGCGGTACCGTGCGGCGCGCAA<br>ACCACAGCCACGCCACCAAGGACCTGACCGGCTCCATCGCCGCCGGCAA<br>CTACCCGGAGTGGACGTTCTACATCCAGACCATCGACCCGGACACGAGG<br>ATCGGTTGACTTCGACCCGCTGGACGTGACCAAGACGTGCCCCGAGGA<br>CGTGGTGCCGCTGCAGCCGTGGGGCGGCTGGTGTGAACCGCAACATC |

|         |            |                                                                                                                                                                                                                                                                                                                                                                                                                                                                                                                                                                                                                                                                                                                                                                                                                                                                                                                                                                                                                                                                                                                                                                                                                                                                                                                                                                                                                                                                                                                                                                                                          |
|---------|------------|----------------------------------------------------------------------------------------------------------------------------------------------------------------------------------------------------------------------------------------------------------------------------------------------------------------------------------------------------------------------------------------------------------------------------------------------------------------------------------------------------------------------------------------------------------------------------------------------------------------------------------------------------------------------------------------------------------------------------------------------------------------------------------------------------------------------------------------------------------------------------------------------------------------------------------------------------------------------------------------------------------------------------------------------------------------------------------------------------------------------------------------------------------------------------------------------------------------------------------------------------------------------------------------------------------------------------------------------------------------------------------------------------------------------------------------------------------------------------------------------------------------------------------------------------------------------------------------------------------|
|         |            | GACAACTTCTTCGCGGAGAACGAGCAGCTCCCCTTCTGCCCCGGGATCAT<br>CGTCCCCGGGGTGTACTACTCGGACGACAAGCTGCTGCAGACGAGGATCT<br>TCTCCTACTCGGACACGCAGCGCCACCGGCTGGGGCCGAATTACCTGCTG<br>CTGCCGGCCAAACGCGCCCAAGTGCTCCCACCACAACAACCACTACGACG<br>GGCTCATGAACTTCATGCACCGCGACGAGGAGGTGACTACTTCCCCTCC<br>AGGTTGACCCCCGCCAAGCACGCGCCCCGCTACCCCATCCCCTCCCGCA<br>CCCTCAACGGCCGCGCGAGAAGATGGTGATCGAGAAGGAGAACAACCTT<br>CAAGCAGCCCCGGGAGAGGTACCGCTCCATGGACCCGGCAAGGCAAGAG<br>CGATTCATCAACAGATGGATCGATGCGCTGTCCGACCCCCGCCTCACCCA<br>CGAGATCAAGGCCATCTGGCTCTCCTACTGGTCTCAGGCTGACAAGTCTC<br>TCGGCCAGAAGCTCGCGAGCCGTCTCAGCTCCAAGCCGAGCATGTAA                                                                                                                                                                                                                                                                                                                                                                                                                                                                                                                                                                                                                                                                                                                                                                                                                                                                                                                                                                                                  |
| CAT1-4B | D86327.1   | ATGTGGAGCACCAACTCCGGCGCGCCCGTCTGGAACAACGACAACCTCCC<br>TCACCGTCGGATCCCCGAGGTCCGATCCTGCTGGAGGACTACCACCTGGT<br>GGAGAAGATCGCCGACTTCGACCGTGAGCGCATCCCGGAGCGGGTGTA<br>CACGCCCCGGGGCGCCACGGCCAAGGGCTTCTTCGAGGTACCCACGAC<br>GTCTCCACCTGACCTGCGCCGACTTCCTCCGCGCGCCGGGGGTGCAGA<br>CCCCCGTCATAGTGCCTTCTCCACCGTGATCCACGAGCGCGGCTCCCC<br>CGAGACGCTCCGCGACCCGCGCGGCTTCGCCATCAAGTTCTACACCCGG<br>GAGGGCAACTGGGACCTGGTGGGCAACAACCTCCCCGTCTTCTTCATCCG<br>CGACGGCATGAAGTTCCCGGACATGGTGACGCGCTCAAGCCCCAACCCC<br>AAGACCCACATCCAGGAGAAGTGGCGGATCCTCGACTTCTTCTCCACCA<br>CCCGGAGTCGCTCCACATGTTACCTTCTCTTCGACGACATCGGCGTGC<br>CCGCCGACTACCGCCACATGGACGGCTCCGGCGTCAACACCTACACGCT<br>GGTGAACCGCGCCGGCAAGGCGCACTACGTCAAGTTCCACTGGAAGCCC<br>ACCTGCGGCGTCAAGTCGCTGCTGGAGGAGGAGGCGGTACCGTGGGC<br>GGCACCACACAGCCACGCCACCAAGGACCTCACCGACTCCATCGCCG<br>CCGGCAACTACCCGGAGTGGACCTTCTACATCCAGACCATCGACCCGGA<br>CTATGAGGAGCGGTTGCACTTCGACCCGCTGGACGTGACCAAGACGTGG<br>CCCGAGGACGTGGTGCCGCTGCAGCCCGTGGGGCGGCTGGTGCTGAAC<br>CGCAACATCGACAACCTTCTTCTCGGAGAACGAGCAGCTGGCCTTCTGCC<br>CGGGATCATCGTCCCCGGGGTGTACTACTCGGACGACAAGCTGCTGCAG<br>ACAAGGATCTTCTCCTACTCCGACACGCAGCGCCACCGTCTGGGGCCCAA<br>CTACCTGCTGCTGCCGGCCAACGCGCCCAAGTGCTCCCACCACAACAAC<br>CACTACGACGGGCTCATGAACTTCATGCACCGCGACGAGGAGGTGCACT<br>ACTTCCCCTCAAGTTCCGACCCCGCCAAGCACGCGCCCCGCTACCCCAT<br>CCCCTCCCGCACCCCTCAACGGCCGCGCGAGAAGATGGTGATCGAGAAG<br>GAGAACAACCTCAAGCAGCCCCGGGAGAGGTACCGCTCCATGGACCCGG<br>CAAGGCAAGAGCGATTTCATCAACAGATGGATCGACGCGCTGTCCGACCC<br>CCGCCTCACCCATGAGATCAAGGCCATCTGGCTCTCCTACTGGTCTCAGG<br>CTGACAAGTCTCTCGGCCAGAAGCTCGCGAGCCGTCTCAGCTCCAAGCC<br>GAGCATGTAA |
| CAT1-4D | AK454435.1 | ATGTGGAGCACCAACTCCGGCGCGCCCGTCTGGAACAACGACAACCTCCCT<br>CACCGTCGGATCCCCGAGGTCCCATCCTGCTGGAGGACTACCACCTGGTG<br>GAGAAGATCGCCGACTTCGACCGCGAGCGCATCCCGGAGCGGGTGCTGC<br>ACGCGCGTGGCGCCAGCGCCAAGGGCTTCTTCGAGGTGACCCACGACGT<br>GTCCACCTGACCTGCGCCGACTTCCTCCGCGCCCCCGGCGTGCAGACC<br>CCCGTCATCGTGCGCTTCTCCACCGTGATCCACGAGCGCGGCTCCCCCG<br>AGACGCTCCGCGACCCGCGCGGCTTCGCCATCAAGTTCTACACCCGGGA<br>GGGCAACTGGGACCTGGTCGGCAACAACCTCCCCGTCTTCTTCATCCGCG<br>ACGGCATGAAGTTCCCGGACATGGTGACGCGCTCAAGCCCCAACCCCAA<br>GACCCACATCCAGGAGAAGTGGCGCATCCTCGACTTCTTCTCCACCAACC<br>CGGAGTCGCTCCACATGTTACCTTCTCTTCGACGACATCGGCGTGCCC<br>GCCGACTACCGCCACATGGACGGCTCCGGCGTCAACACCTACACGCTCGT<br>CAACCGCGCCGGCAAGGCGCACTACGTCAAGTTCCACTGGAAGCCACC<br>TGCGGCGTCAAGTCGCTCCTCGAGGAGGAGGCGGTACGGTGGGCGGC<br>ACCAACCACAGCCACGCCACCAAGGACCTGACCGACTCCATCGCCGCCG<br>GCAACTACCCGGAGTGGACCTTCTACATCCAGACCATGACCCGGACAC<br>GAGGACCGCTTCGACTTTGACCCGCTGGACGTGACCAAGACGTGGCCCG<br>AGGACGTGGTGCCGCTGCAGCCGGTGGGGCGGCTGGTGCTCAACCGCA<br>ACATCGACAACCTTCTTCGCGGAGAACGAGCAGCTGGCCTTCTGCCCCGGG<br>ATCATCGTCCCCGGGGTGTACTACTCGGACGACAAGCTGCTGCAGACGAG<br>GATCTTCTCCTACTCGGACACGCAGCGCCACCGCCTGGGGCCCAACTACC                                                                                                                                                                                                                                                                                                                                                                                                                                                 |

|         |                |                                                                                                                                                                                                                                                                                                                                                                                                                                                                                                                                                                                                                                                                                                                                                                                                                                                                                                                                                                                                                                                                                                                                                                                                                                                                                                                                                                                                                                                                                                                                                                                                                                                                        |
|---------|----------------|------------------------------------------------------------------------------------------------------------------------------------------------------------------------------------------------------------------------------------------------------------------------------------------------------------------------------------------------------------------------------------------------------------------------------------------------------------------------------------------------------------------------------------------------------------------------------------------------------------------------------------------------------------------------------------------------------------------------------------------------------------------------------------------------------------------------------------------------------------------------------------------------------------------------------------------------------------------------------------------------------------------------------------------------------------------------------------------------------------------------------------------------------------------------------------------------------------------------------------------------------------------------------------------------------------------------------------------------------------------------------------------------------------------------------------------------------------------------------------------------------------------------------------------------------------------------------------------------------------------------------------------------------------------------|
|         |                | TGCTGCTGCCGGCCAATGCGCCCAAGTGCTCCCACCACAACAACCACTAC<br>GACGGGCTCATGAACTTCATGCACCGCGACGAGGAGGTGCGACTACTTCCC<br>CTCCAGGTTTCGACCCCGCCAAGCACGCGCCCCGCTACCCCATCCCCTCG<br>CGCACCTCAACGGCCGCGCGAGAAGATGGTGATCGAGAAGGAGAACA<br>ACTTCAAGCAGCCCGGGGAGAGGTACCGCTCCATGGACCCGGCAAGGCA<br>AGAGCGATTTCATCAACAGATGGATCGATGCGCTGTCCGACCCCCGCCTCA<br>CCCACGAGATCAAGGCCATCTGGCTCTCCTACTGGTCTCAGGCTGACAAG<br>TCTCTCGGCCAGAAGCTCGCGAGCCGTCTCAGCTCGAAGCCGAGCATGTA<br>A                                                                                                                                                                                                                                                                                                                                                                                                                                                                                                                                                                                                                                                                                                                                                                                                                                                                                                                                                                                                                                                                                                                                                                                                                        |
| CAT2-6A | XM_037594016.1 | ATGGATCCCTGCAAGTTCCGGCCGTCGAGCAGCTTCGACACCAAGACGA<br>CGACGACCAACGCCGGCCAGCCGGTGTGGAACGACAACGAGGCGCTCA<br>CCGTCGGCCCGCGCGGCCCGATCTTGCTGGAGGACTACCACTGCTGGA<br>GAAGATCGCCCACTTCGCGCGCGAGCGCATCCCGGAGCGGTGGTGCA<br>CGCGCGGGGCGCCTCCGCCAAGGGCTTCTTCGAGTGACCCACGACGTG<br>ACGGGCTTGACCTGCGCCGACTTCCTCCGCGCGCCGGGGGCGCGCACG<br>CCGGTCATCGTCCGCTTTTCCACGGTGATCCACGAGCGCGGCTCGCCGG<br>AGACGATCCGTGACCCGCGCGGGTTCGCCGTCAAGTTCTACACGCGCGA<br>GGGCAACTGGGACCTGCTCGGCAACAACCTCCCCGTCTTCTTCATCCGCG<br>ACGGCATCAAGTTCCCCGACGTCATCCACGCCTTCAAACCCAACCCCAAG<br>TCGCATGTGCAGGAGTACTGGCGGCTTTCGACTTCCTCTCCCACACCC<br>CGAGAGCCTCCACACCTTCTTCTTCTTCTCGACGACGTGCGCATCCCA<br>CCGACTACCGCCACATGGACGGCTTCGGGGTCAACACCTACACCTTCGTCT<br>TCCCGTGCCGGCAAGTCCCACTACGTCAAGTTCCACTGGCGCCCCACCT<br>GCGGCGTCAGCTGCCTCATGGACGACGAGGCCACGCTCGTCGGCGGCA<br>AGAACCACAGCCACGCCACGCAGGACCTCTACGACTCCATCGACGCCGG<br>CAACTTCCCCGAGTGGAAGCTGTTCTGTCAGGTATCGACCCCGACGAC<br>GAGGACCGCTTCGACTTCGACCCGCTCGACGACACCAAGACATGGCCCG<br>AGGACCTCGTCCCCCTCAGCCCGTCGGCCGCTCGGCCGCTCGTCTGACCGCAA<br>CGTCGACAACCTTCTTCAACGAGAACGAGCAGCTGGCCTTCGGCCCGGGG<br>CTCGTCGTGCCCGGGATCTACTACTCCGACGACAAGATGCTGCAGTGCA<br>GGTGTTTCGCCTACGCCGACACGCAGCGCTACCGCCTCGGCCCAAACCTAC<br>CTGATGCTCCCCGTCAACGCGCCCAAGTGCGGCTTCAAGAACAACCACTA<br>CGACGGCGCCATGAACCTTCATGCACCGCGACGAGGAGGTGGACTACTAC<br>CCGTCCCGCCACGCGCCGCTCCGGCAGGCCGAGCCGGCCAGCTTCCCC<br>GTGCCGACGAGGCCCCGTGTCGGGAAAAGGGAGAAGACGCTGACCGCAA<br>AGGAGAACGACTTCGTGCAGCCCGGGGAGAGGTACCGCAGCTGGGCGC<br>CCGACCGCCAGGACAGGTTCTGTGCGCCGCTTCGCCGACGCCCTCGCCCA<br>CCCCAAGGTCAGCCACGAGCTCCGCGTCATCTGGATCGACTTCCTCTCCA<br>AGTGTGACAAGTCGTGCGGCATGAAGGTGGCCAACCGCCTTAACGTGAA<br>GCCAAGCATGTGA |
| CAT2-6B | XM_037599040.1 | ATGGATCCCTGCAAGTTCCGGCCGTCGAGCAGCTTCGACACCAAGACGA<br>CGACGACGAACGCCGGCCAGCCCGTGTGGAACGACAACGAGGCGCTCA<br>CCGTGCGCCCCCGCGGCCCATCCTGCTGGAGGACTACCACTGCTGGA<br>GAAGATCGCCCACTTCGCGCGCGAGCGCATCCCGGAGCGGGTGGTGCA<br>CGCCCGGGGCGCCTCCGCCAAGGGCTTCTTCGAGTGACCCACGACGTG<br>ACCGGCCTCACCTGCGCCGACTTCCTCCGCGCGCCGGGGGCGCGGACG<br>CCCGTCATCGTCCGCTTCTCCACCGTCATCCACGAGCGCGGCTCGCCCG<br>AGACGATCCGCGACCCGCGCGGGTTCGCCGTCAAGTTCTACACGCGCGA<br>GGGCAACTGGGACCTGCTCGGCAACAACCTCCCCGTCTTCTTCATCCGCG<br>ACGGCATCAAGTTCCCCGACGTCATCCACGCCTTAAAGCCCAACCCCAAG<br>TCCACGTGCAGGAGTACTGGCGCGTCTTCGACTTCCTCTCCACCAACCC<br>CGAGAGCCTCCACACCTTCTTCTTCTTCTCGACGACGTGCGCATCCCA<br>CGGACTACCGCCATATGGACGGCTTCGGCGTCAACACCTACACCTTCGTCT<br>TCCCGCGCCGGCAAGGCCCACTACGTCAAGTTCCACTGGCGCCCCACCT<br>GCGGCGTCAGCTGCCTCATGGACGACGAGGCCACCTCGTCGGCGGGCAA<br>GAACCACAGCCACGCCACCCAGGACCTCTACGACTCCATCGACGCCGGC<br>AACTTCCCCGAGTGGAAGCTTCTGTCAGGTATCGACCCGACCGACGACA<br>GGACCGCTTCGACTTCGACCCGCTCGACGACACCAAGACTTGGCCCGAG<br>GACCTCGTCCCCCTCCAGCCCGTGGGACGCCTCGTGCTCGACCGCAACG<br>TCGACAACCTTCTTCAACGAGAACGAGCAGCTCGCCTTCGGCCCCGGCCTC<br>GTCGTGCCCGGGATCTACTACTCCGACGACAAGATGCTGCAGTGCAAGG<br>TGTTGCGCTACGCCGACACGCAGCGCTACCGCCTGGGGCCAAACTACCT                                                                                                                                                                                                                                                                                                                                                                                                                                                              |

|         |            |                                                                                                                                                                                                                                                                                                                                                                                                                                                                                                                                                                                                                                                                                                                                                                                                                                                                                                                                                                                                                                                                                                                                                                                                                                                                                                                                                                                                                                                                                                                                                                                                                                                                        |
|---------|------------|------------------------------------------------------------------------------------------------------------------------------------------------------------------------------------------------------------------------------------------------------------------------------------------------------------------------------------------------------------------------------------------------------------------------------------------------------------------------------------------------------------------------------------------------------------------------------------------------------------------------------------------------------------------------------------------------------------------------------------------------------------------------------------------------------------------------------------------------------------------------------------------------------------------------------------------------------------------------------------------------------------------------------------------------------------------------------------------------------------------------------------------------------------------------------------------------------------------------------------------------------------------------------------------------------------------------------------------------------------------------------------------------------------------------------------------------------------------------------------------------------------------------------------------------------------------------------------------------------------------------------------------------------------------------|
|         |            | GATGCTCCCCGTCAACGCGCCCAAGTGCGGCTTCAAGAACAACCACTACG<br>ACGGCGCCATGAACTTCATGCACCGGGACGAGGAGGTGGACTACTACCC<br>GTCCCGCCACGCGCCGCTCCGGCACGCTGAGCCGGCCAGCTTCCCCGT<br>GCCGACGCGGCCCCGTGTCGGGAAAAGGGAGAAGACGAGGATCAAGAA<br>GGAGAACGACTTCGTGCAGCCCGGGAGAGGTACCGCAGCTGGGCGCC<br>CGACCGGCAGGACAGGTTCTGTGCGCCGCTTCGCCGACGCGCTCGCCCA<br>CCCCAAGGTCAGCCACGAGCTCCGCGTCATCTGGATCGACTTCCTCTCCA<br>AGTGTGACAAGTCGTGCGGCATGAAGGTGGCCAACCGTCTCAACGTGAA<br>GCCAAGCATGTGA                                                                                                                                                                                                                                                                                                                                                                                                                                                                                                                                                                                                                                                                                                                                                                                                                                                                                                                                                                                                                                                                                                                                                                                                                    |
| CAT2-6D | AK456618.1 | ATGGATCCCTGCAAGTTCCGGCCGTCGAGCAGCTTCGACACCAAGACGAC<br>GACCACCAACGCCGGCCAGCCGGTGTGGAACGACAACGAGGCGCTCACC<br>GTCGGCCCCGCGCGGCCCCATCCTGCTGGAGGACTACCACCTGCTGGAGA<br>AGATCGCCCACTTCGCGCGCGAGCGCATCCCGGAGCGCGCTGCCACG<br>CAGGGGCGCCTCCGCCAAGGGCTTCTTCGAGTGACCCACGACGTCACC<br>GGCCTCACCTGCGCCGACTTCCTCCGCGCGCCCCGGGGCGCGCACCCCC<br>GTCATCGTCCGCTTCTCCACCGTCATCCACGAGCGCGGCTCGCCCCGAGAC<br>CATCCGCGACCCGCGCGGGTTCGCCGTCAAGTTCTACACGCGCGAGGGC<br>AACTGGGACCTGCTCGGCAACAACCTCCCCGTCTTCTTCATCCGCGACGG<br>CATCAAGTTCCCCGACGTCATCCACGCCTTCAAGCCCAACCCCAAGTCGC<br>ACGTGCAGGAGTACTGGCGCGTCTTCGACTTCCTCTCCCACCAACCCGAG<br>AGCCTCCACACCTTCTTCTTCTCTTCGACGACGTCGGCATCCCCACCGA<br>CTACCGCCACATGGACGGCTTCGGCGTCAACACCTACACCTTCGTCTCCC<br>GCGCTGGCAAGTCCCACTACGTCAAGTTCCACTGGAGGCCACCTGCGG<br>CGTCAGCTGCCTCATGGACGACGAGGCCACCCTCGTCGGCGGCAAGAAT<br>CACAGCCACGCCACCCAGGACCTCTACGACTCCATCGACGCCGGCAACTT<br>CCCCGAGTGGAAGCTCTTCGTGCAGGTCATCGACCCCGACGACGAGGAC<br>CGCTTCGACTTCGACCCGCTCGACGACACCAAGACCTGGCCCCGAGGACC<br>TCGTCCCCCTCCAGCCCGTGGGGCGCCTCGTGCTCGACCGCAACGTCTGA<br>CAACTTCTTCAACGAGAACGAGCAGCTGGCCTTCGGCCCCGGGGCTCGTC<br>GTGCCCCGGGATCTACTACTCGGACGACAAGATGCTGCAGTGCAGGGTGT<br>CGCCTACGCCGACACGCAGCGCTACCGCCTGGGGCCCCAACTACCTGATG<br>CTCCCCGTCAACGCGGCCAAGTGCGGCTTCAAGAACAACCACTACGACGG<br>CGCCATGAACTTCATGCACCGCGACGAGGAGGTGGACTACTACCCGTCAC<br>GCCACGCGCCGCTCCGGCACGCCGAGCCGGCCAGCTTCCCCGTGCCCA<br>CGCGGCCCGTCGTGGAAGGAGGAGAAGACGAGGATCAAGAAGGAGAA<br>CGACTTCGTGCAGCCCGGGGAGAGGTACCGCAGCTGGGCGCCCGACCG<br>CCAGGACAGGTTCTGTGCGCCGCTTCGCCGACGCGCTCGCCCACCCCAAG<br>GTCAGCCACGAGCTCCGCGTCATCTGGATCGACTTCCTCTCCAAGTGTGA<br>CAAGTCGTGCGGCATGAAGGTGGCCAACCGCCTTAACGTGAAGCCAAGCA<br>TGTGA |

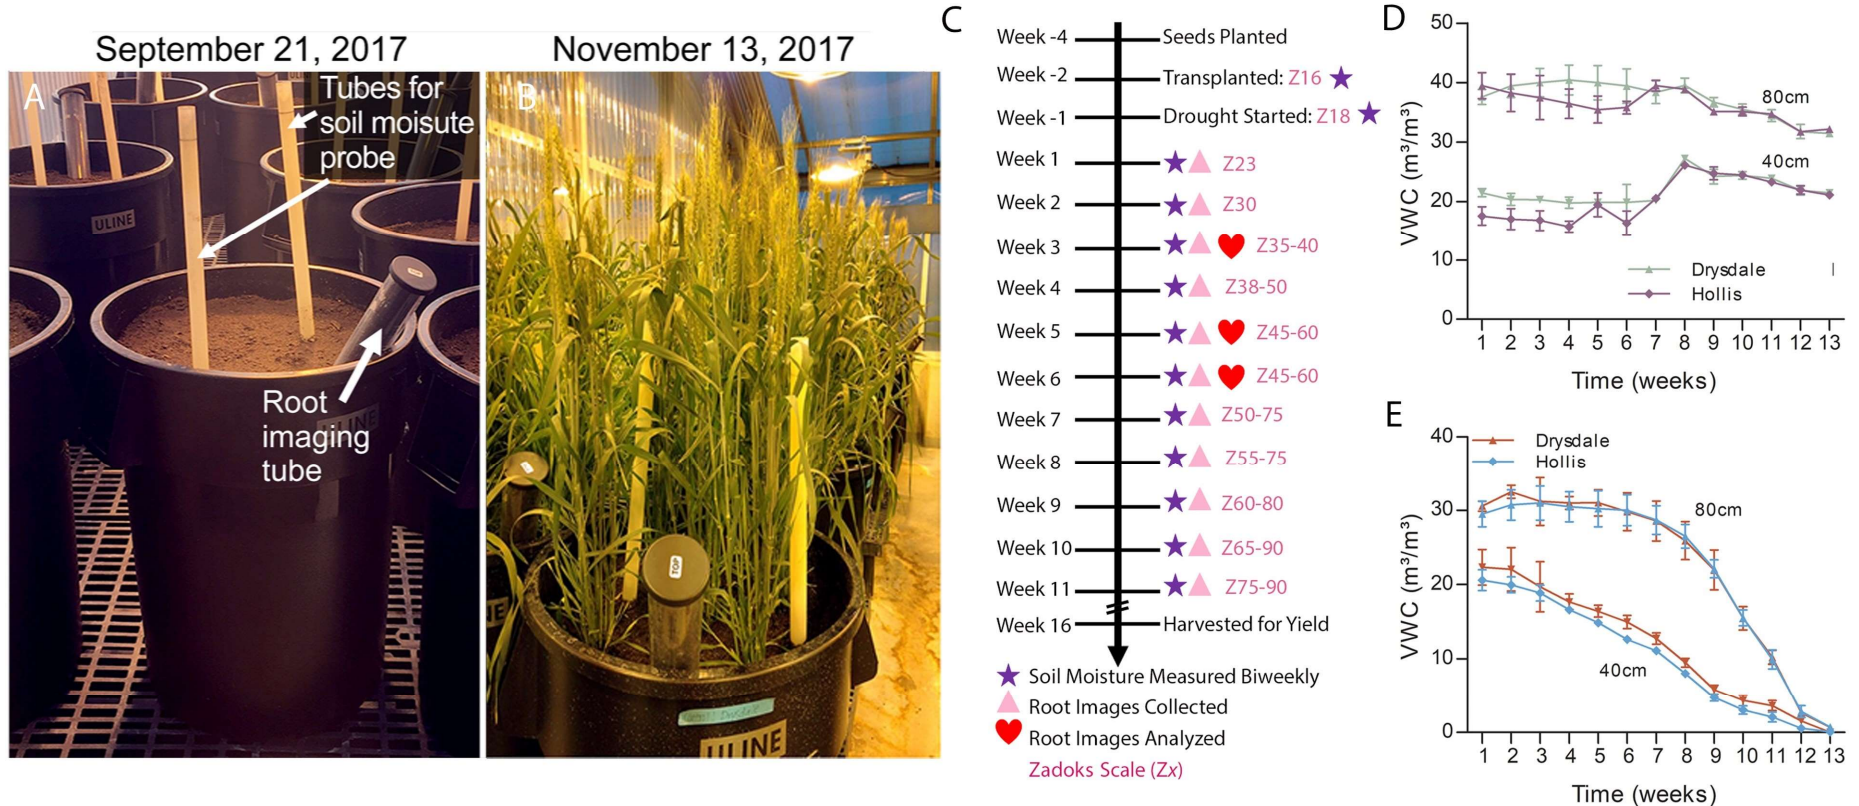

**Supplemental Figure S1. Experimental setup for measuring impact of drought on root growth and yield.**

**A**, A representative bin prior to planting the seedlings. Each bin contains one root imaging tube in the center and two soil moisture probe tubes on either side of the imaging tube.

**B**, A representative image a watered control bin with Drysdale plants. Each bin contained five plants.

**C**, The experimental timeline. The seedlings were acclimated to the bins for two weeks. Drought was induced by stopping watering and maintained until the harvest. Control bins were watered daily until the plants started to dry. Soil moisture was measured twice per week. Root images were collected once a week, but only data from wheat 3, 5, and 6 were analyzed. Yield parameters were measured at the end of the experiment.

**D, E**, The average soil VWC values in watered control (**D**) and drought (**E**) bins taken at 40cm or 80cm soil depth. The error bars represent standard deviation of values from two watered control bins or three drought stress bins.



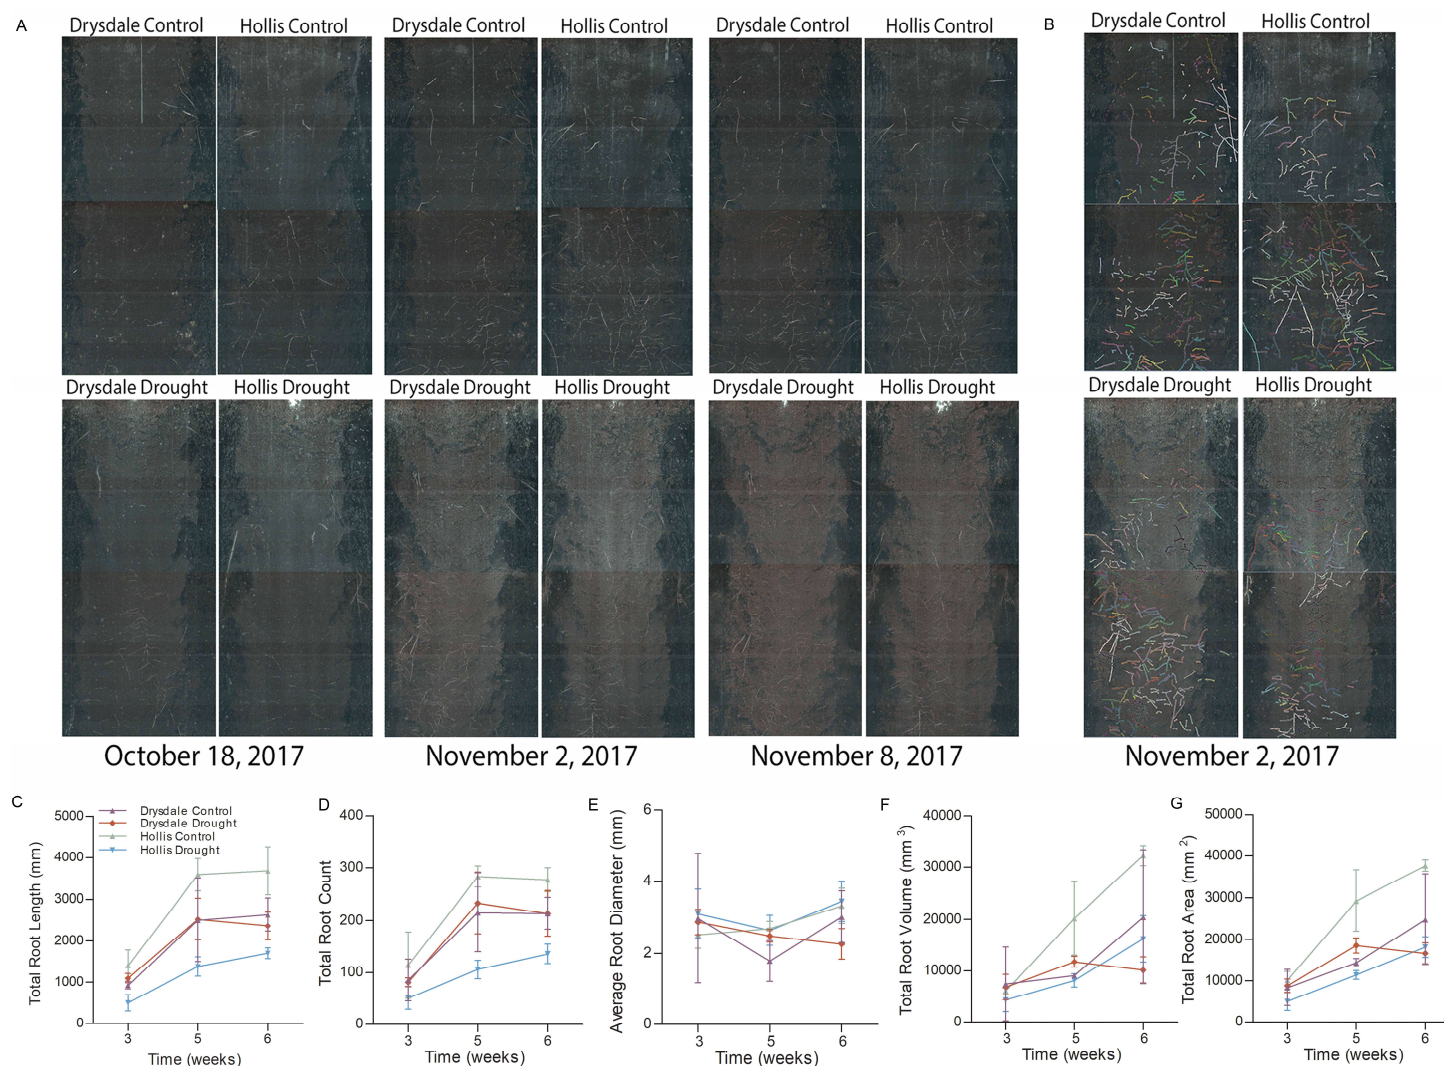

### Supplemental Figure S2. Analysis of root growth response to drought stress.

**A**, Representative images of roots in control and drought stress bins for Drysdale and Hollis for each of the 3 timepoints analyzed.

**B**, Representative images of root analysis using RootSnap! Program for control and drought stress bins.

**C, D, E, F, G**, The average total root length (**C**), the average total root count (**D**), the average root diameter (**E**), the average root volume (**F**), and the average total root area (**G**), for control and drought stressed Drysdale and Hollis plants. The error bars represent standard deviation of values from two watered control bins or three drought stress bins.



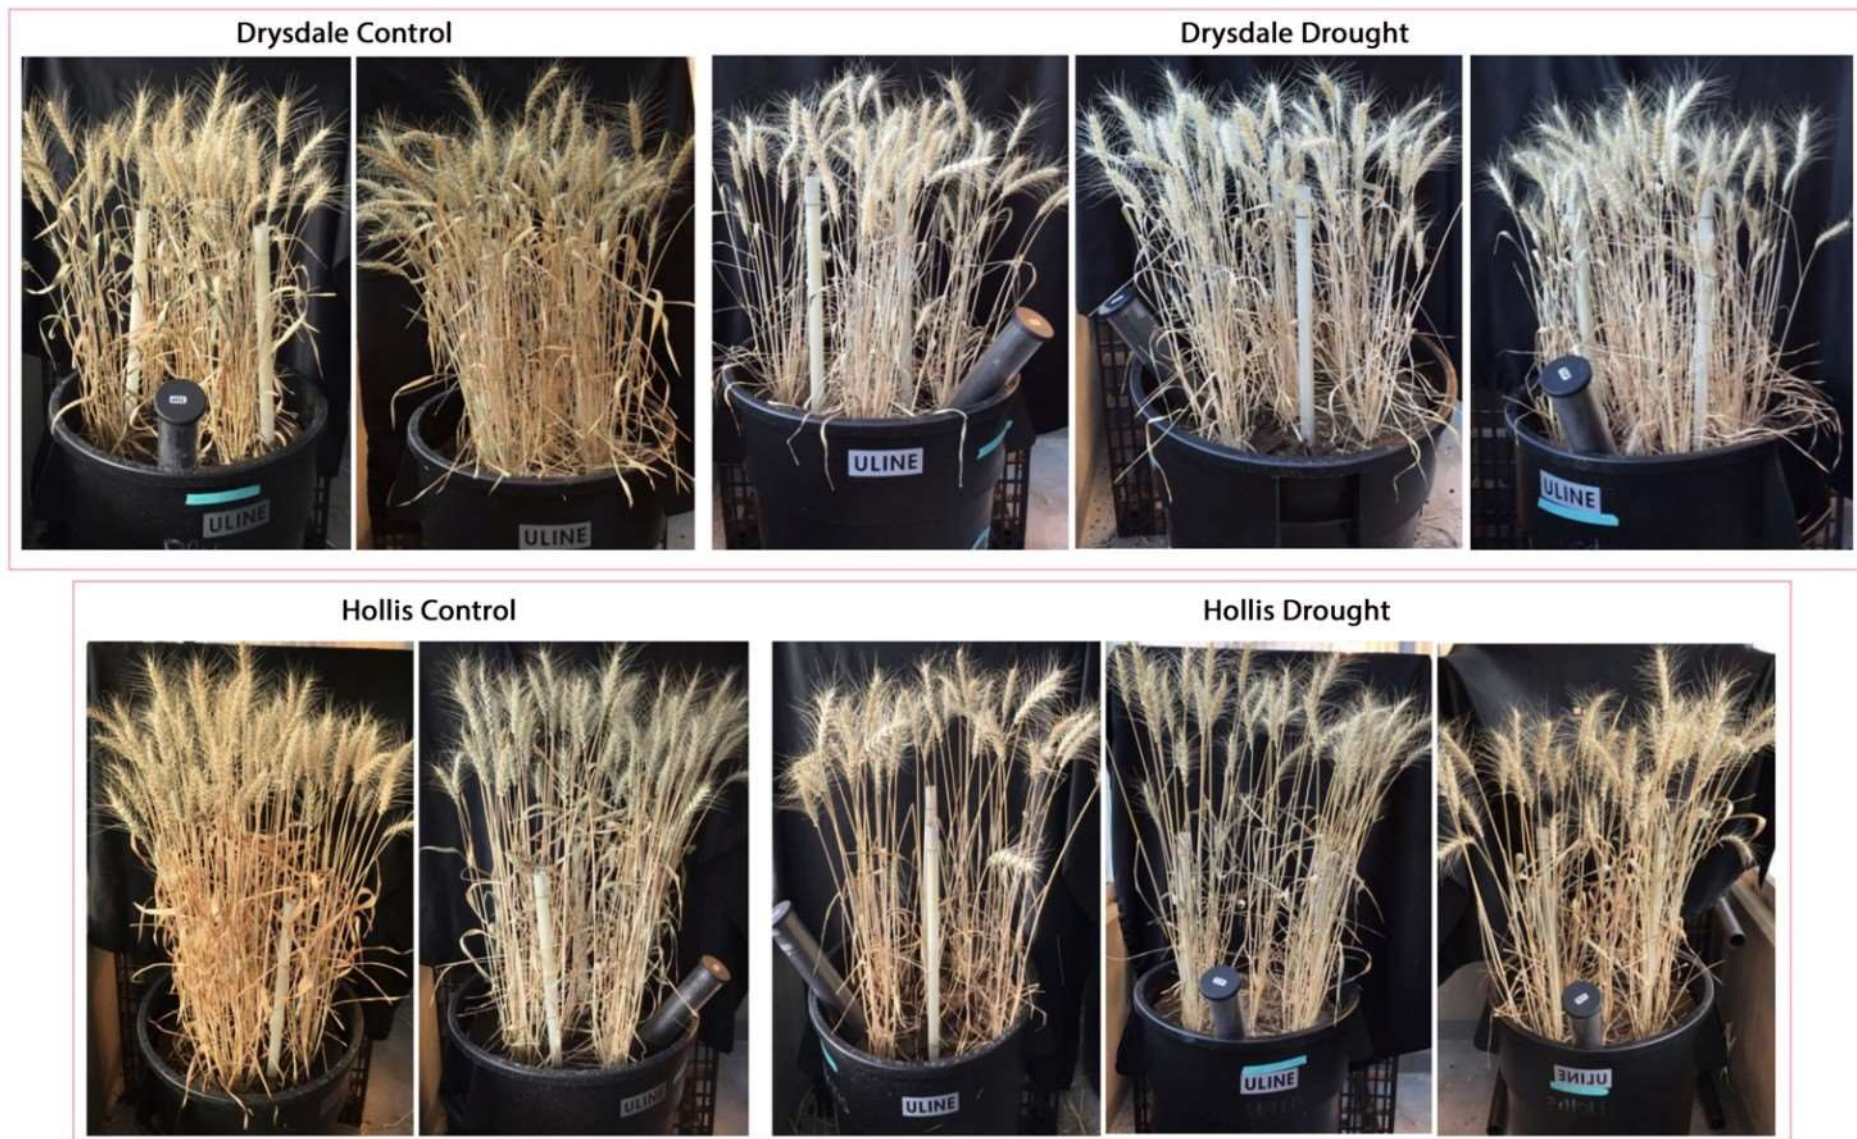

**Supplemental Figure S3. Images of bins taken prior to harvest.**



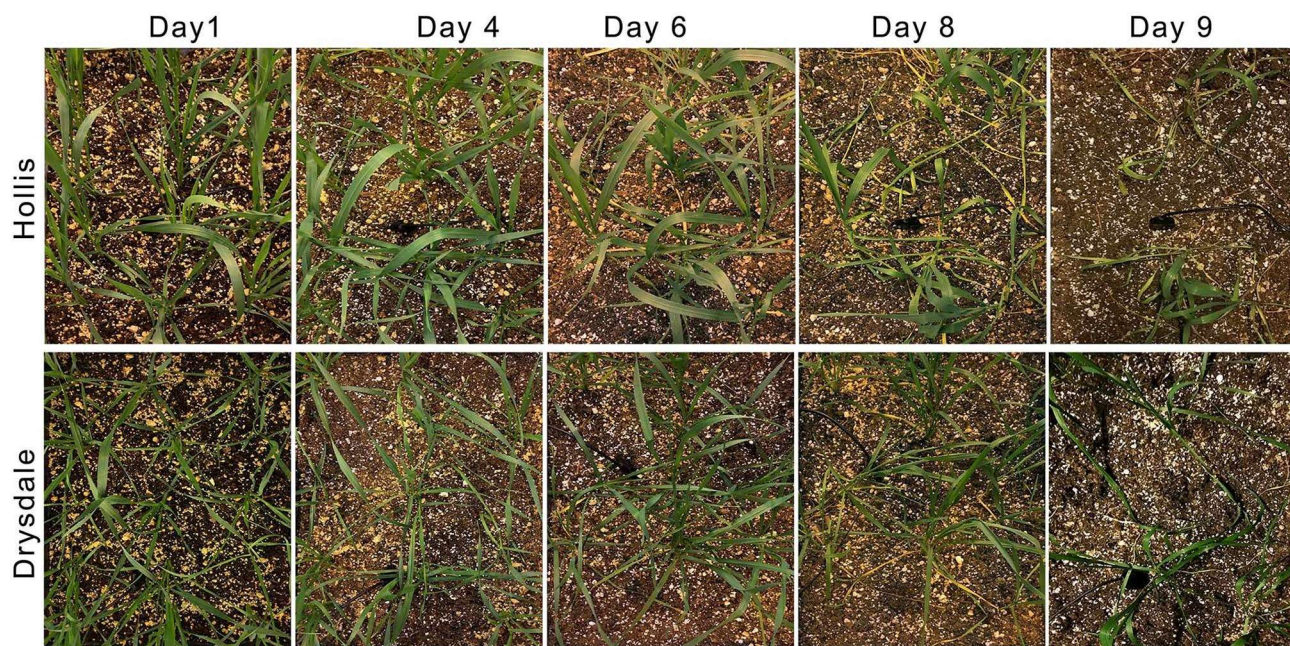

**Supplemental Figure S4. Representative images of Hollis and Drysdale plants taken at different stages of drought stress.**

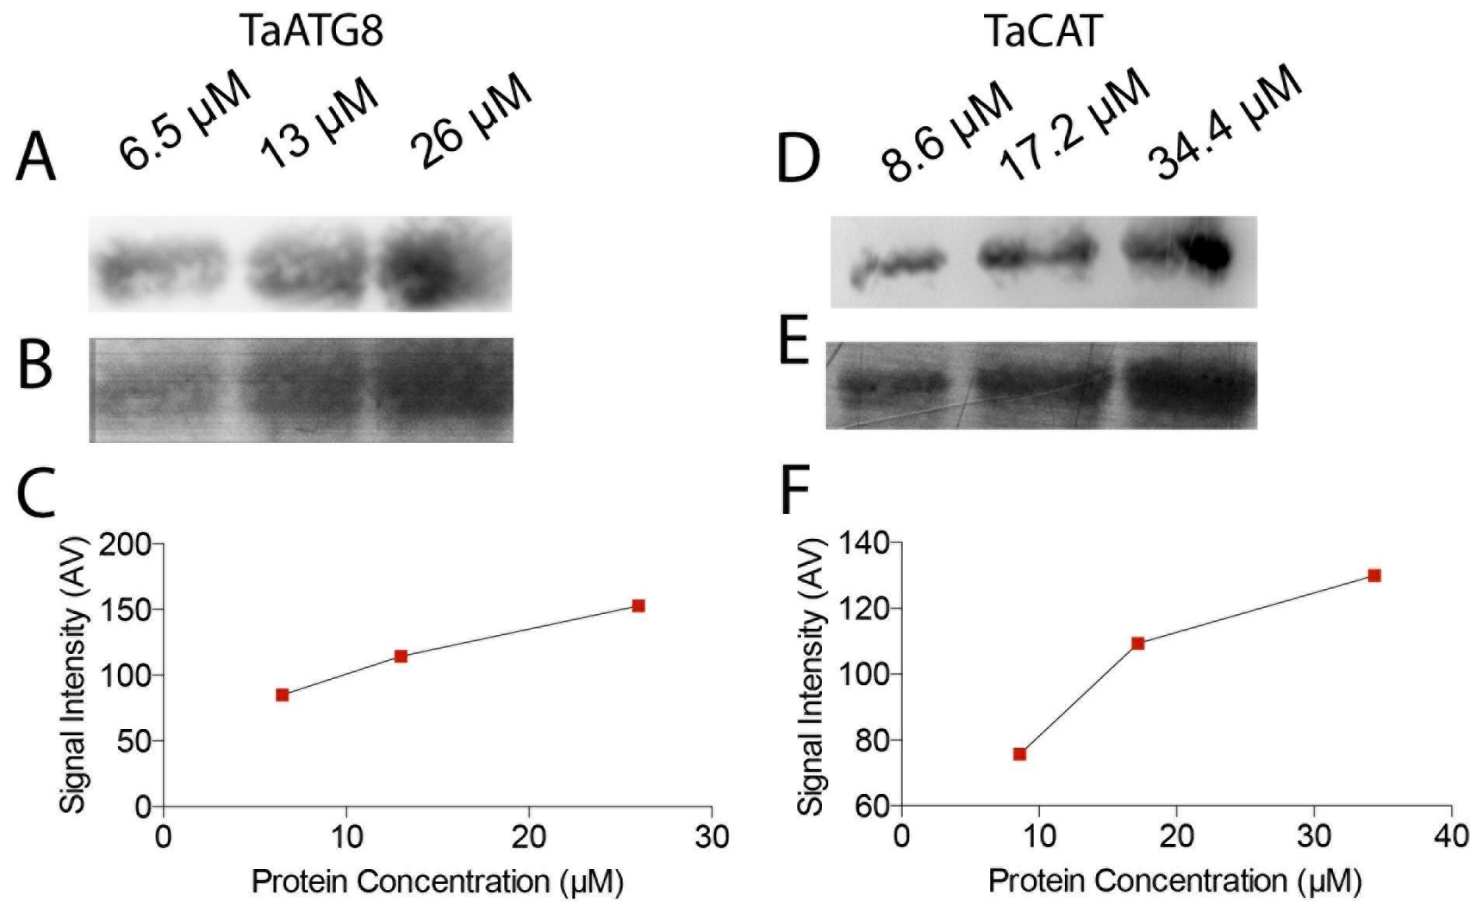

**Supplemental Figure S5. Correlation between protein loading and Western blotting signal for wheat ATG-8 and CAT antibodies.**

**A,D** Western blotting with anti-ATG8 or anti-CAT at different protein loading ( $\mu\text{M}$ ).

**B,E**, Colloidal silver staining of the nitrocellulose membrane shown in **A** or **D**.

**C,F**, Quantification of the luminescence signal in **A** or **D**.
